# Supplementary material for: Nup93 regulates breast tumor growth by modulating cell proliferation and actin cytoskeleton remodeling
Source: PubMed Central journal article supplement (PMC6971368; doi:10.26508/lsa.201900623), 2020-01-20
Supplement: LSA-2019-00623_review_history.pdf [file LSA-2019-00623_review_history.pdf]

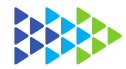

## **Nup93 regulates triple negative breast tumor growth by modulating cell proliferation and actin cytoskeleton remodeling**

Simone Bersini, Nikki K. Lytle, Roberta Schulte, Ling Huang, Geoffrey M. Wahl, and Martin W. Hetzer

**DOI: 10.26508/lsa.201900623**

*Corresponding author(s): Prof. Martin W Hetzer (Salk Institute for Biological Studies)*

---

### **Review timeline:**

---

|                     |            |
|---------------------|------------|
| Submission Date:    | 2019-12-04 |
| Editorial Decision: | 2019-12-05 |
| Revision Received:  | 2019-12-12 |
| Editorial Decision: | 2019-12-16 |
| Revision Received:  | 2019-12-17 |
| Accepted:           | 2019-12-19 |

---

Scientific Editor: Andrea Leibfried

### **Transaction Report:**

(Note: With the exception of the correction of typographical or spelling errors that could be a source of ambiguity, letters and reports are not edited. The original formatting of letters and referee reports may not be reflected in this compilation.)

Please note that the manuscript was previously reviewed at another journal and the reports were taken into account in the decision-making process at Life Science Alliance.

No Peer Review Process File is available with this article, as the authors have chosen not to make the review process public in this case.

---

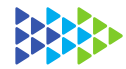

December 5, 2019

Re: Life Science Alliance manuscript #LSA-2019-00623-T

Prof. Martin W Hetzer  
Salk Institute for Biological Studies  
Molecular and Cell Biology Laboratory  
10010 N. Torrey Pines Road  
La Jolla, CA CA

Dear Dr. Hetzer,

Thank you for transferring your manuscript entitled "Nup93 regulates triple negative breast tumor growth by modulating cell proliferation and actin cytoskeleton remodeling" to Life Science Alliance. The manuscript was assessed by expert reviewers at another journal before, and the editors transferred those reports to us with your permission.

The reviewers, and especially reviewer #2, appreciated the quality of the data provided, but they would have expected further reaching mechanistic insight. While a detailed mechanistic understanding is not needed for publication in Life Science Alliance, reviewer #2 provides constructive input on how to strengthen your conclusions, and we would like to invite you to submit a revised version of your manuscript, taking this input into account. Please get in touch in case you would like to discuss individual revision points further.

To upload the revised version of your manuscript, please log in to your account:  
<https://lsa.msubmit.net/cgi-bin/main.plex>

You will be guided to complete the submission of your revised manuscript and to fill in all necessary information. Please get in touch in case you do not know or remember your login name.

While you are revising your manuscript, please also attend to the below editorial points to help expedite the publication of your manuscript. Please direct any editorial questions to the journal office.

The typical timeframe for revisions is three months. Please note that papers are generally considered through only one revision cycle, so strong support from the referees on the revised version is needed for acceptance.

When submitting the revision, please include a letter addressing the reviewers' comments point by point.

Thank you for this interesting contribution to Life Science Alliance. We are looking forward to receiving your revised manuscript.

Sincerely,

Andrea Leibfried, PhD  
Executive Editor  
Life Science Alliance  
Meyerhofstr. 1  
69117 Heidelberg, Germany  
t +49 6221 8891 502  
e [a.leibfried@life-science-alliance.org](mailto:a.leibfried@life-science-alliance.org)

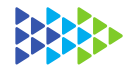

[www.life-science-alliance.org](http://www.life-science-alliance.org)

---

#### A. THESE ITEMS ARE REQUIRED FOR REVISIONS

- A letter addressing the reviewers' comments point by point.
- An editable version of the final text (.DOC or .DOCX) is needed for copyediting (no PDFs).
- High-resolution figure, supplementary figure and video files uploaded as individual files: See our detailed guidelines for preparing your production-ready images, <http://www.life-science-alliance.org/authors>
- Summary blurb (enter in submission system): A short text summarizing in a single sentence the study (max. 200 characters including spaces). This text is used in conjunction with the titles of papers, hence should be informative and complementary to the title and running title. It should describe the context and significance of the findings for a general readership; it should be written in the present tense and refer to the work in the third person. Author names should not be mentioned.

#### B. MANUSCRIPT ORGANIZATION AND FORMATTING:

Full guidelines are available on our Instructions for Authors page, <http://www.life-science-alliance.org/authors>

We encourage our authors to provide original source data, particularly uncropped/-processed electrophoretic blots and spreadsheets for the main figures of the manuscript. If you would like to add source data, we would welcome one PDF/Excel-file per figure for this information. These files will be linked online as supplementary "Source Data" files.

**\*\*\*IMPORTANT:** It is Life Science Alliance policy that if requested, original data images must be made available. Failure to provide original images upon request will result in unavoidable delays in publication. Please ensure that you have access to all original microscopy and blot data images before submitting your revision.\*\*\*

---



December 16, 2019

RE: Life Science Alliance Manuscript #LSA-2019-00623-TR

Prof. Martin W Hetzer  
Salk Institute for Biological Studies  
Molecular and Cell Biology Laboratory  
10010 N. Torrey Pines Road  
La Jolla, CA CA

Dear Dr. Hetzer,

Thank you for submitting your revised manuscript entitled "Nup93 regulates breast tumor growth by modulating proliferation and actin cytoskeleton remodeling". I appreciate your response to the concerns raised and the additional data provided, and would thus be happy to publish your paper in Life Science Alliance pending final revisions necessary to meet our formatting guidelines.

- Please upload all figure files as individual ones, including the supplementary figure files; all figure legends should only appear in the main manuscript file
- Please upload the movies you mention
- It would be good to introduce sub-panels and more descriptors in figures S2 and S4 and S6 for more clarity
- Please either change or mention in the manuscript figure legends that the cell displayed in Fig 1A and S6 is the same
- Please provide the source data for Figure 5A and S2
- Please include the mass spec raw data
- Please describe in the M&M section the procedure to arrive at binary images
- Please provide documentation about informed consent for the Indivumed-derived human tissues / include a statement in your manuscript

If you are planning a press release on your work, please inform us immediately to allow informing our production team and scheduling a release date.

To upload the final version of your manuscript, please log in to your account:

<https://lsa.msubmit.net/cgi-bin/main.plex>

You will be guided to complete the submission of your revised manuscript and to fill in all necessary information. Please get in touch in case you do not know or remember your login name.

To avoid unnecessary delays in the acceptance and publication of your paper, please read the following information carefully.

#### A. FINAL FILES:

These items are required for acceptance.

-- An editable version of the final text (.DOC or .DOCX) is needed for copyediting (no PDFs).

-- High-resolution figure, supplementary figure and video files uploaded as individual files: See our detailed guidelines for preparing your production-ready images, <http://www.life-science-alliance.org/authors>

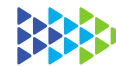

-- Summary blurb (enter in submission system): A short text summarizing in a single sentence the study (max. 200 characters including spaces). This text is used in conjunction with the titles of papers, hence should be informative and complementary to the title. It should describe the context and significance of the findings for a general readership; it should be written in the present tense and refer to the work in the third person. Author names should not be mentioned.

**B. MANUSCRIPT ORGANIZATION AND FORMATTING:**

Full guidelines are available on our Instructions for Authors page, <http://www.life-science-alliance.org/authors>

We encourage our authors to provide original source data, particularly uncropped/-processed electrophoretic blots and spreadsheets for the main figures of the manuscript. If you would like to add source data, we would welcome one PDF/Excel-file per figure for this information. These files will be linked online as supplementary "Source Data" files.

**\*\*Submission of a paper that does not conform to Life Science Alliance guidelines will delay the acceptance of your manuscript.\*\***

**\*\*It is Life Science Alliance policy that if requested, original data images must be made available to the editors. Failure to provide original images upon request will result in unavoidable delays in publication. Please ensure that you have access to all original data images prior to final submission.\*\***

**\*\*The license to publish form must be signed before your manuscript can be sent to production. A link to the electronic license to publish form will be sent to the corresponding author only. Please take a moment to check your funder requirements.\*\***

Thank you for your attention to these final processing requirements. Please revise and format the manuscript and upload materials within 7 days.

Thank you for this interesting contribution, we look forward to publishing your paper in Life Science Alliance.

Sincerely,

Andrea Leibfried, PhD  
Executive Editor  
Life Science Alliance  
Meyerhofstr. 1  
69117 Heidelberg, Germany  
t +49 6221 8891 502  
e [a.leibfried@life-science-alliance.org](mailto:a.leibfried@life-science-alliance.org)  
[www.life-science-alliance.org](http://www.life-science-alliance.org)

-----  
**3<sup>rd</sup> Editorial Decision**

**19 December 2019**

December 19, 2019

RE: Life Science Alliance Manuscript #LSA-2019-00623-TRR



Prof. Martin W Hetzer  
Salk Institute for Biological Studies  
Molecular and Cell Biology Laboratory  
10010 N. Torrey Pines Road  
La Jolla, CA CA

Dear Dr. Hetzer,

Thank you for submitting your Research Article entitled "Nup93 regulates breast tumor growth by modulating proliferation and actin cytoskeleton remodeling". It is a pleasure to let you know that your manuscript is now accepted for publication in Life Science Alliance. Congratulations on this interesting work.

The final published version of your manuscript will be deposited by us to PubMed Central upon online publication.

Your manuscript will now progress through copyediting and proofing. It is journal policy that authors provide original data upon request.

Reviews, decision letters, and point-by-point responses associated with peer-review at Life Science Alliance will be published online, alongside the manuscript. If you do want to opt out of having the reviewer reports and your point-by-point responses displayed, please let us know immediately.

\*\*\*IMPORTANT: If you will be unreachable at any time, please provide us with the email address of an alternate author. Failure to respond to routine queries may lead to unavoidable delays in publication.\*\*\*

Scheduling details will be available from our production department. You will receive proofs shortly before the publication date. Only essential corrections can be made at the proof stage so if there are any minor final changes you wish to make to the manuscript, please let the journal office know now.

**DISTRIBUTION OF MATERIALS:**

Authors are required to distribute freely any materials used in experiments published in Life Science Alliance. Authors are encouraged to deposit materials used in their studies to the appropriate repositories for distribution to researchers.

You can contact the journal office with any questions, [contact@life-science-alliance.org](mailto:contact@life-science-alliance.org)

Again, congratulations on a very nice paper. I hope you found the review process to be constructive and are pleased with how the manuscript was handled editorially. We look forward to future exciting submissions from your lab.

Sincerely,

Andrea Leibfried, PhD  
Executive Editor  
Life Science Alliance  
Meyerhofstr. 1  
69117 Heidelberg, Germany  
t +49 6221 8891 502  
e [a.leibfried@life-science-alliance.org](mailto:a.leibfried@life-science-alliance.org)  
[www.life-science-alliance.org](http://www.life-science-alliance.org)
