# Supplementary material for: Nup93 regulates breast tumor growth by modulating cell proliferation and actin cytoskeleton remodeling
Source: Life Sci Alliance. 2020 Jan 20;3(1):e201900623. doi: 10.26508/lsa.201900623 (PMC6971368; doi:10.26508/lsa.201900623)
Supplement: Supplementary file 14 [file LSA-2019-00623_TableS1.xlsx]

## Sheet: Sheet1
Supplementary Table 1
Homer de novo Motif Results for Nup93 KD
Rank	Motif	P-value	log P-value	% of Targets	% of Background	Best Match (match score)
1		1e-642	-1480	0.4138	0.1006	Jun-AP1(bZIP)/K562-cJun-ChIP-Seq(GSE31477)/Homer(0.995)
2		1e-69	-159.3	0.1321	0.0598	IRF2(IRF)/Erythroblas-IRF2-ChIP-Seq(GSE36985)/Homer(0.901)
3		1e-63	-146.8	0.1457	0.0716	NFY(CCAAT)/Promoter/Homer(0.929)
4		1e-50	-115.4	0.1439	0.0772	Sp2(Zf)/HEK293-Sp2.eGFP-ChIP-Seq(Encode)/Homer(0.910)
5		1e-48	-110.8	0.2767	0.1862	FOSL1::JUND(var.2)/MA1143.1/Jaspar(0.861)
6		1e-45	-104.3	0.0557	0.0195	YY1(Zf)/Promoter/Homer(0.947)
7		1e-39	-90.91	0.3036	0.218	Elk1(ETS)/Hela-Elk1-ChIP-Seq(GSE31477)/Homer(0.962)
8		1e-37	-86.52	0.2527	0.1751	PH0065.1_Hoxc10/Jaspar(0.735)
9		1e-36	-84.96	0.0732	0.0334	Fox:Ebox(Forkhead,bHLH)/Panc1-Foxa2-ChIP-Seq(GSE47459)/Homer(0.864)
10		1e-36	-84.89	0.5341	0.4382	HMBOX1/MA0895.1/Jaspar(0.678)
11		1e-35	-81.23	0.2561	0.1803	PRDM1/MA0508.2/Jaspar(0.750)
12		1e-34	-79.47	0.4131	0.3243	Arid3a/MA0151.1/Jaspar(0.649)
13		1e-33	-76	0.0725	0.0346	NRF1(NRF)/MCF7-NRF1-ChIP-Seq(Unpublished)/Homer(0.979)
14		1e-31	-73.09	0.5327	0.444	Foxa2/MA0047.2/Jaspar(0.634)
15		1e-29	-67.88	0.0582	0.0265	GFY(?)/Promoter/Homer(0.927)
16		1e-23	-53.55	0.2998	0.2339	Nr2e3/MA0164.1/Jaspar(0.815)
17		1e-22	-52.29	0.4741	0.4003	RUNX2/MA0511.2/Jaspar(0.733)
18		1e-20	-47.58	0.3061	0.2436	PB0046.1_Mybl1_1/Jaspar(0.669)
19		1e-19	-45.11	0.2232	0.1694	NFE2L2(bZIP)/HepG2-NFE2L2-ChIP-Seq(Encode)/Homer(0.670)
20		1e-17	-39.7	0.1081	0.0724	PB0192.1_Tcfap2e_2/Jaspar(0.765)
21		1e-15	-35.9	0.4652	0.4048	MYBL1/MA0776.1/Jaspar(0.584)
